# Supplementary material for: DiTEC-WDN: A Large-Scale Dataset of Hydraulic Scenarios across Multiple Water Distribution Networks
Source: Springer Nature journal article supplement (doi:10.1038/s41597-025-06026-0), 2025-11-03
Supplement: MOESM1 [file 41597_2025_6026_MOESM1_ESM.pdf]

# 1 Supplementary Information

| WDN                   | Description                                                                                                                                                                                      | Junctions | Pipes | Reservoirs | Tanks | Pumps | Patterns |
|-----------------------|--------------------------------------------------------------------------------------------------------------------------------------------------------------------------------------------------|-----------|-------|------------|-------|-------|----------|
| ky1                   | Synthetic <a href="#">Water Distribution Networks (WDNs)</a> based on a statewide database of water systems originally developed by the Kentucky Infrastructure Authority, in United States.     | 856       | 985   | 1          | 2     | 1     | 2        |
| ky2                   |                                                                                                                                                                                                  | 811       | 1125  | 1          | 3     | 1     | 3        |
| ky3                   |                                                                                                                                                                                                  | 269       | 371   | 3          | 3     | 5     | 3        |
| ky4                   |                                                                                                                                                                                                  | 959       | 1158  | 1          | 4     | 2     | 3        |
| ky5                   |                                                                                                                                                                                                  | 420       | 505   | 4          | 3     | 9     | 3        |
| ky6                   |                                                                                                                                                                                                  | 543       | 647   | 2          | 3     | 2     | 4        |
| ky7                   |                                                                                                                                                                                                  | 481       | 604   | 1          | 3     | 1     | 4        |
| ky8                   |                                                                                                                                                                                                  | 1325      | 1618  | 2          | 5     | 4     | 4        |
| ky10                  |                                                                                                                                                                                                  | 920       | 1061  | 2          | 13    | 13    | 4        |
| ky13                  |                                                                                                                                                                                                  | 778       | 944   | 2          | 5     | 4     | 3        |
| ky14                  |                                                                                                                                                                                                  | 377       | 553   | 4          | 3     | 5     | 3        |
| ky16                  |                                                                                                                                                                                                  | 791       | 915   | 3          | 4     | 7     | 3        |
| ky18                  |                                                                                                                                                                                                  | 772       | 917   | 4          | 0     | 3     | 9        |
| ky24_v                |                                                                                                                                                                                                  | 288       | 292   | 2          | 0     | 0     | 3        |
| 19 Pipe System        | An artificial WDN with two sources. It was used for analyzing flow distribution in hydraulic networks.                                                                                           | 12        | 21    | 2          | 0     | 0     | 3        |
| Anytown               | It is a hypothetical WDN used as part of a Battle of the Networks competition aimed at improving analysis methods.                                                                               | 19        | 41    | 3          | 0     | 1     | 1        |
| new_york              | It represents the water supply transmission tunnels for the City of New York in 1969. It was originally used to optimize duplications to the existing system to meet projected demand increases. | 19        | 42    | 1          | 0     | 0     | 4        |
| Jilin                 | It is a synthetic network used as part of a study of optimization of WDNs via online retrained metamodels.                                                                                       | 27        | 34    | 1          | 0     | 0     | 1        |
| hanoi                 | This WDN is based on the planned trunk network of Hanoi, Vietnam. It was originally used to test pipe size optimization software.                                                                | 31        | 34    | 1          | 0     | 0     | 0        |
| fossolo (foss_poly_1) | It is based on the WDN of the Fossolo neighborhood in Bologna, Italy. It was used for WDN design optimization.                                                                                   | 36        | 58    | 1          | 0     | 0     | 0        |
| FOWM                  | It is a skeletonized version of the WDN of northern Arlington County in the United States.                                                                                                       | 44        | 49    | 1          | 0     | 0     | 0        |
| EPANET Net 3          | It is based on the North Marin WDN in Novato, California. It was used as part of a water quality study.                                                                                          | 92        | 119   | 2          | 3     | 2     | 5        |

Continues on Next Page...

Supplementary Table S1 – Continued

| WDN                         | Description                                                                                                                                                       | Junctions | Pipes | Reservoirs | Tanks | Pumps | Patterns |
|-----------------------------|-------------------------------------------------------------------------------------------------------------------------------------------------------------------|-----------|-------|------------|-------|-------|----------|
| FFCL-1                      | It is based on the Fairfield WDN, a relatively small system with a single source. It was originally used to study numerical modeling methods for water quality.   | 111       | 126   | 0          | 1     | 0     | 3        |
| Zhi Jiang (ZJ)              | It is a simplified version of the Zhi Jiang WDN in the eastern province of China. It was originally used as part of a design and optimization study.              | 113       | 164   | 1          | 0     | 0     | 0        |
| WA1                         | It is based on the Bellingham WDN in Washington, US. It was originally used for water quality modeling.                                                           | 121       | 169   | 0          | 2     | 0     | 6        |
| OBCL-1                      | It is based on the Cheshire WDN located near Harrisburg, Pennsylvania. It was used originally to study the kinetics of chlorine decay.                            | 262       | 289   | 1          | 0     | 1     | 5        |
| modena                      | It is a simplified version of the WDN of the town of Modena, Italy. It was originally used for WDN design studies.                                                | 268       | 317   | 4          | 0     | 0     | 0        |
| NPCL-1                      | It is based on the North Penn Water Authority WDN. It was originally used for water quality studies.                                                              | 337       | 399   | 0          | 2     | 0     | 17       |
| Marchi Rural (RuralNetwork) | This WDN was adapted from an irrigation system in Australia. It was originally used as part of a design and optimization study.                                   | 379       | 476   | 2          | 0     | 0     | 0        |
| CTOWN                       | It is based on a real small WDN, the data was in part obtained from a geographic information system of the Municipality of C-Town, and a part from SCADA systems. | 388       | 444   | 1          | 7     | 11    | 5        |
| d-town                      | It is a hypothetical WDN created as part of a Battle of the Networks focused on long term improvement plans that account for greenhouse gas emissions.            | 399       | 459   | 1          | 7     | 11    | 5        |
| balerma                     | This WDN is an adaptation of an existing irrigation network in the Sol-Poniente irrigation district, located in Balerna in the province of Almería in Spain.      | 443       | 454   | 4          | 0     | 0     | 0        |
| L-TOWN                      | It is a synthetic WDN, based on a real WDN of a city in Cyprus. It was created for the Battle of Leakage Detection and Isolation Methods (BattLeDIM).             | 782       | 909   | 2          | 1     | 1     | 107      |

Continues on Next Page...

Supplementary Table S1 – Continued

| WDN         | Description                                                                                                                                                  | Junctions | Pipes | Reservoirs | Tanks | Pumps | Patterns |
|-------------|--------------------------------------------------------------------------------------------------------------------------------------------------------------|-----------|-------|------------|-------|-------|----------|
| KL          | It is a synthetic WDN, originally used in a study on the heuristic hierarchical approach to optimization of WDN design.                                      | 935       | 1274  | 1          | 0     | 0     | 0        |
| Exnet (EXN) | It is a synthetic WDN proposed by the Centre for Water Systems of Exeter University. It was created as a benchmark in multi-objective optimization problems. | 1891      | 2467  | 2          | 0     | 0     | 0        |
| Large       | It is a hypothetical WDN based on a real data. It has one source node, which supplies the entire WDN. It was used originally for design optimization.        | 3557      | 4021  | 1          | 0     | 0     | 0        |

**Supplementary Table S1.** List of collected [WDNs](#).
